# Supplementary material
Source: Springer Nature journal article supplement (https://www.springermedizin.de/resource/supplementary/13584_2014_136_MOESM2_ESM.pdf/9677040)

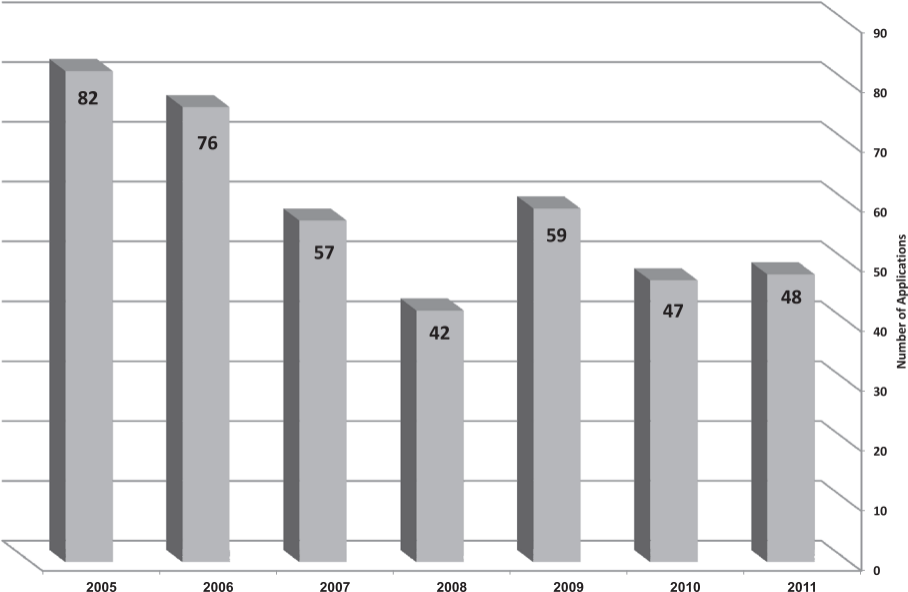

Supplement: MOESM2 [file 9677040]
